# Supplementary material for: Complete Traumatic Spinal Cord Injury: Current Insights Regarding Timing of Surgery and Level of Injury
Source: PubMed Central journal article supplement — Global Spine J. 2019 May 1;10(3):324–31. doi: 10.1177/2192568219844990 (PMC7160809; doi:10.1177/2192568219844990), 2019-05-01
Supplement: Suppl_2_GSJ.pdf [file Suppl_2_GSJ.pdf]

| <b>Natural history cervical tSCI <sup>22</sup></b> |                                   |      |      |      |      |
|----------------------------------------------------|-----------------------------------|------|------|------|------|
|                                                    | <b>ASIA recovery at follow-up</b> |      |      |      |      |
| <b>Baseline ASIA</b>                               | A%                                | B%   | C%   | D%   | E%   |
| A                                                  | 70.2                              | 14.6 | 8.0  | 7.1  | 0    |
| B                                                  | 8.8                               | 24.8 | 29.6 | 36.8 | 0    |
| C                                                  | 0.9                               | 2.8  | 13.8 | 80.7 | 1.8  |
| D                                                  | 0                                 | 0.7  | 0.7  | 84.4 | 14.1 |

Supplement 1: The natural ASIA recovery in complete and incomplete cervical tSCI
